# Supplementary material for: Reduction of 4-nitrophenol to 4-aminophenol using a novel Pd@NixB–SiO2/RGO nanocomposite: enhanced hydrogen spillover and high catalytic performance
Source: Royal Society of Chemistry journal article supplement (doi:10.1039/c5ra05523g), 2015-01-01
Supplement: c5ra05523g1.pdf [file c5ra05523g1.pdf]

Supplementary Material (ESI) for Catalysis Science & Technology

This journal is The Royal Society of Chemistry

Electronic Supplementary Information (ESI)

## Reduction of 4-nitrophenol to 4-aminophenol using novel Pd@Ni<sub>x</sub>B - SiO<sub>2</sub>/RGO nanocomposite: Enhanced hydrogen spillover and high catalytic performance

Rahul Krishna, Diana M. Fernandes, Valdemar F. Domingos, Edivagner S. Ribeiro, João Campos Gil, Catarina Dias, João Ventura, Cristina Freire, Elby Titus

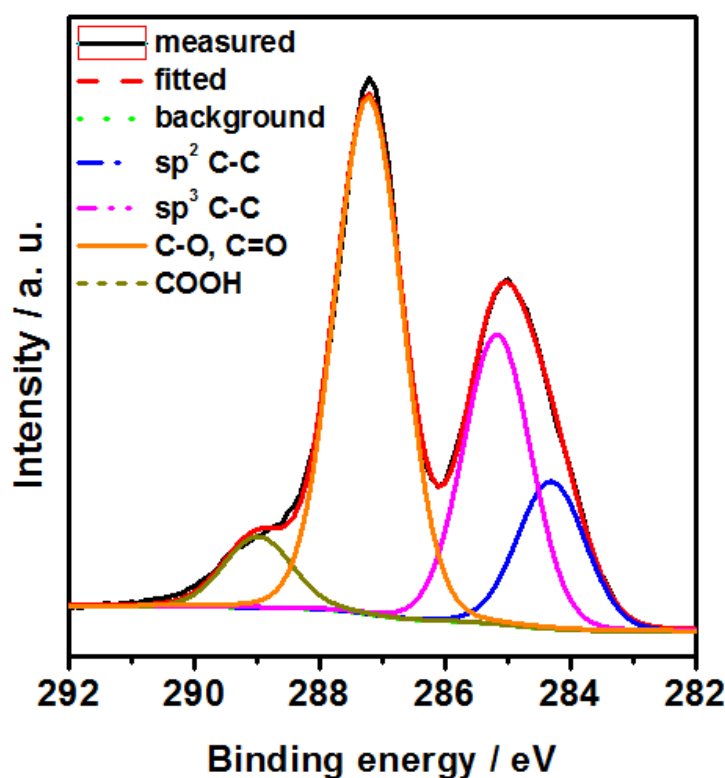

Figure S1. Deconvoluted XPS spectra of GO.

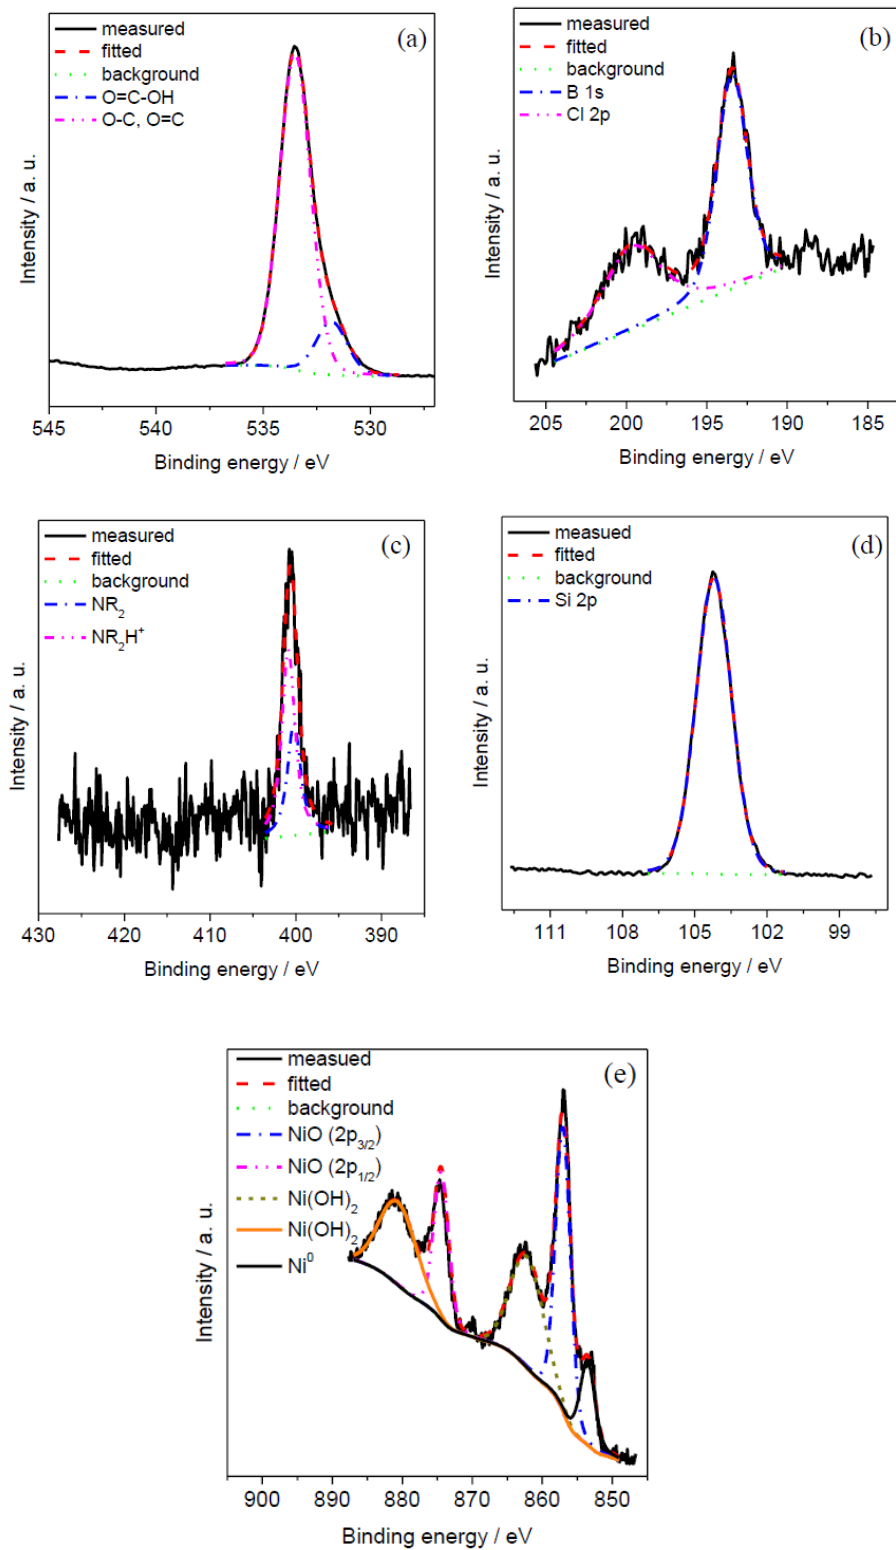

**Figure S2.** Deconvoluted XPS spectra for Pd@NSG: (a) O 1s, (b) B 1s, (c) N 1s, (d) Si 2p and (e) Ni 2p.

| Sample | Atomic % |      |      |      |       |       |       |       |
|--------|----------|------|------|------|-------|-------|-------|-------|
|        | C 1s     | O 1s | N 1s | B 1s | Si 2p | Cl 2p | Ni 2p | Pd 3d |
| GO     | 66.2     | 33.8 |      |      |       |       |       |       |
| Pd@NSG | 18.2     | 57.1 | 0.8  | 3.2  | 15.3  | 0.5   | 4.1   | 0.8   |

**Table S1.** Surface atomic percentages of each component for GO and Pd@NSG.

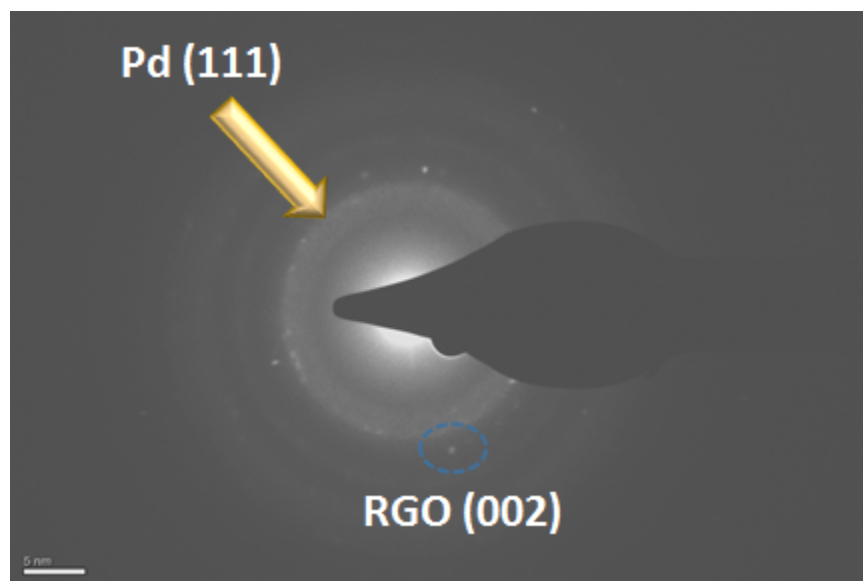

**Figure S3.** Selected area electron diffraction (SAED) of Pd@NSG where arrow indicated the (111) lattice fringe of Pd and bright spot (inside of dotted marked blue circle) originated due to the diffraction from (002) plane of RGO.

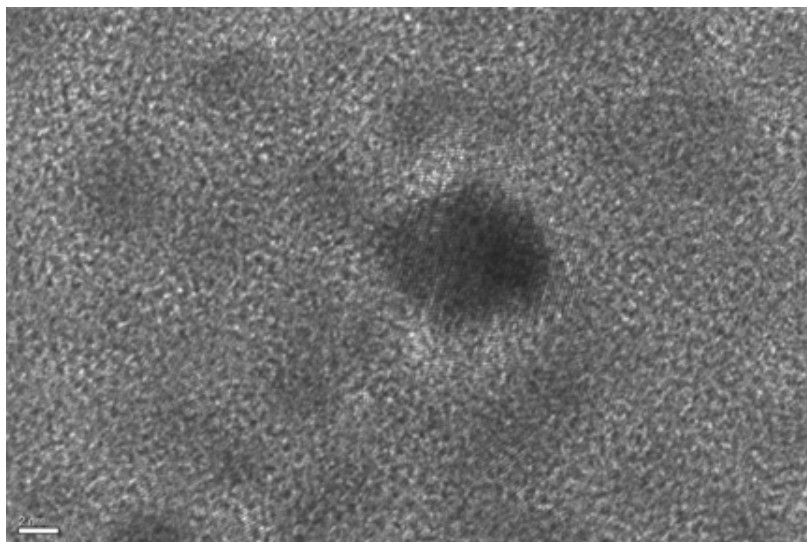

**Figure S4.** High resolution transmission electron spectroscopy (HRTEM) image of Pd@NSG nanocomposite.

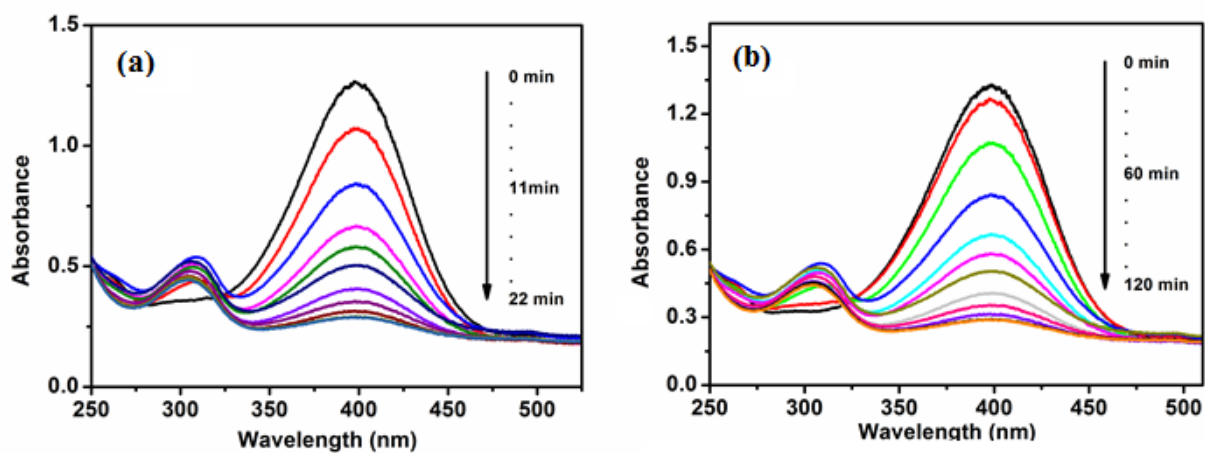

**Figure S5.** UV-vis spectra of 4-NP reduction by  $\text{NaBH}_4$  in aqueous medium at 25 °C (a) with Pd@SiO<sub>2</sub>/RGO nanocomposite and (b) Ni<sub>x</sub>B-SiO<sub>2</sub>/RGO.

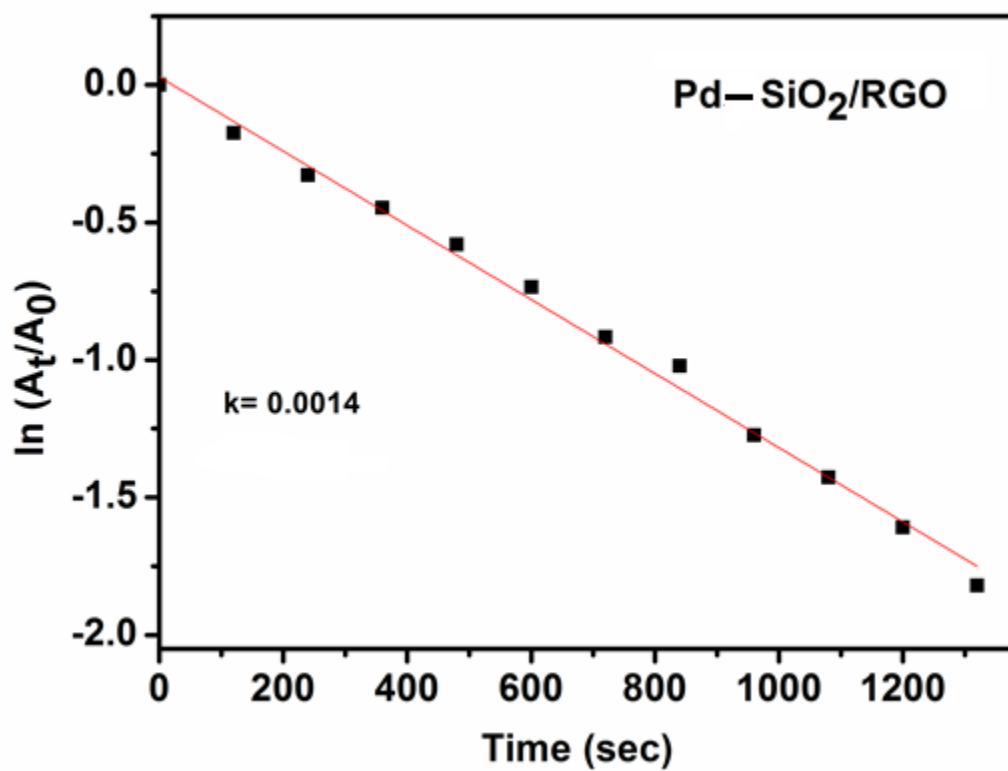

**Figure S6.** Pseudo-first order plots of 4-NP reduction catalysed by Pd-SiO<sub>2</sub>/RGO in the presence of NaBH<sub>4</sub>.
